# ERRATUM

## Association between Intraoperative Hypotension and Hypertension and 30-day Postoperative Mortality in Noncardiac Surgery: Erratum

In the article beginning on page 307 of the August 2015 issue, there are errors in table 5. The reference group for the “Percent change from baseline SBP” should be “Reference ( $\leq 29\%$ ).” The values under the “Percent change from baseline SBP” should be “SBP” with incremental increases from baseline SBP ranging from 30% to greater than 50%. The corrected table is printed below.

**Table 5.** Patient Counts, 30-day Mortality Rates, and Adjusted OR for Percent Change from Baseline Thresholds (n = 12,675)

| Threshold                                 | Unadjusted     |            | Risk-adjusted*             |         |
|-------------------------------------------|----------------|------------|----------------------------|---------|
|                                           | Total Patients | Death (%)  | OR (95% CI)                | P Value |
| Percent change from baseline SBP          |                |            |                            |         |
| Reference ( $\leq 29\%$ )                 | 2,288          | 23 (1.01)  |                            |         |
| SBP decrease 30%–39% for 2–4.9 min        | 1,017          | 13 (1.28)  | 0.783 (0.379–1.618)        |         |
| SBP decrease 30%–39% for $\geq 5$ min     | 2,665          | 25 (0.94)  | 0.568 (0.310–1.039)        |         |
| SBP decrease 40%–49% for 2–4.9 min        | 1,276          | 16 (1.25)  | 0.619 (0.311–1.231)        | 0.16    |
| SBP decrease 40%–49% for $\geq 5$ min     | 2,124          | 33 (1.55)  | 0.786 (0.439–1.405)        |         |
| SBP decrease $\geq 50\%$ for 2–4.9 min    | 896            | 24 (2.68)  | 1.306 (0.701–2.436)        |         |
| SBP decrease $\geq 50\%$ for $\geq 5$ min | 1,075          | 28 (2.60)  | 1.338 (0.738–2.423)        |         |
| Reference ( $\leq 29\%$ )                 | 2,288          | 23 (1.01)  |                            |         |
| SBP increase 30%–39% for 2–4.9 min        | 981            | 25 (2.55)  | 1.428 (0.757–2.693)        |         |
| SBP increase 30%–39% for $\geq 5$ min     | 489            | 5 (1.02)   | 0.581 (0.208–1.619)        |         |
| SBP increase 40%–49% for 2–4.9 min        | 623            | 7 (1.12)   | 0.560 (0.224–1.400)        | 1       |
| SBP increase 40%–49% for $\geq 5$ min     | 274            | 4 (1.46)   | 0.769 (0.242–2.438)        |         |
| SBP increase $\geq 50\%$ for 2–4.9 min    | 646            | 19 (2.94)  | 1.530 (0.764–3.063)        |         |
| SBP increase $\geq 50\%$ for $\geq 5$ min | 542            | 18 (3.32)  | 1.307 (0.651–2.622)        |         |
| Percent change from baseline MBP          |                |            |                            |         |
| Reference ( $\leq 29\%$ )                 | 2,697          | 27 (1.00)  |                            |         |
| MBP decrease 30%–39% for 2–4.9 min        | 1,088          | 17 (1.56)  | 1.059 (0.551–2.035)        |         |
| MBP decrease 30%–39% for $\geq 5$ min     | 2,928          | 30 (1.02)  | 0.688 (0.394–1.204)        |         |
| MBP decrease 40%–49% for 2–4.9 min        | 1,266          | 21 (1.66)  | 1.240 (0.671–2.293)        | 0.005   |
| MBP decrease 40%–49% for $\geq 5$ min     | 1,924          | 28 (1.46)  | 0.999 (0.564–1.770)        |         |
| MBP decrease $\geq 50\%$ for 2–4.9 min    | 627            | 15 (2.39)  | 1.421 (0.707–2.856)        |         |
| MBP decrease $\geq 50\%$ for $\geq 5$ min | 656            | 25 (3.81)  | <b>2.721 (1.489–4.974)</b> |         |
| Reference ( $\leq 29\%$ )                 | 2,697          | 27 (1.00)  |                            |         |
| MBP increase 30%–39% for 2–4.9 min        | 1,013          | 17 (1.68)  | 1.423 (0.724–2.796)        |         |
| MBP increase 30%–39% for $\geq 5$ min     | 511            | 8 (1.57)   | 1.179 (0.496–2.803)        |         |
| MBP increase 40%–49% for 2–4.9 min        | 596            | 11 (1.85)  | 1.492 (0.683–3.260)        | 0.97    |
| MBP increase 40%–49% for $\geq 5$ min     | 248            | 3 (1.21)   | 0.888 (0.246–3.199)        |         |
| MBP increase $\geq 50\%$ for 2–4.9 min    | 587            | 13 (2.21)  | 1.653 (0.783–3.492)        |         |
| MBP increase $\geq 50\%$ for $\geq 5$ min | 385            | 15 (3.9.0) | 2.800 (1.376–5.694)        |         |
| Percent change from baseline DBP          |                |            |                            |         |
| Reference ( $\leq 29\%$ )                 | 1,520          | 13 (0.86)  |                            |         |
| DBP decrease 30%–39% for 2–4.9 min        | 953            | 7 (0.73)   | 0.648 (0.248–1.688)        |         |
| DBP decrease 30%–39% for $\geq 5$ min     | 2,335          | 22 (0.94)  | 0.987 (0.477–2.039)        |         |
| DBP decrease 40%–49% for 2–4.9 min        | 1,239          | 23 (1.86)  | 1.560 (0.754–3.226)        | 0.06    |
| DBP decrease 40%–49% for $\geq 5$ min     | 1,931          | 31 (1.61)  | 1.578 (0.790–3.150)        |         |
| DBP decrease $\geq 50\%$ for 2–4.9 min    | 1,266          | 22 (1.74)  | 1.630 (0.782–3.397)        |         |
| DBP decrease $\geq 50\%$ for $\geq 5$ min | 1,728          | 43 (2.49)  | 2.359 (1.204–4.625)        |         |
| Reference ( $\leq 29\%$ )                 | 1,520          | 13 (0.86)  |                            |         |
| DBP increase 30%–39% for 2–4.9 min        | 1,159          | 17 (1.47)  | 1.464 (0.674–3.182)        |         |
| DBP increase 30%–39% for $\geq 5$ min     | 547            | 6 (1.10)   | 0.965 (0.345–2.700)        |         |
| DBP increase 40%–49% for 2–4.9 min        | 795            | 9 (1.13)   | 1.216 (0.494–2.988)        | 1       |
| DBP increase 40%–49% for $\geq 5$ min     | 307            | 5 (1.63)   | 1.287 (0.418–3.960)        |         |
| DBP increase $\geq 50\%$ for 2–4.9 min    | 1,111          | 24 (2.16)  | 2.227 (1.069–4.639)        |         |
| DBP increase $\geq 50\%$ for $\geq 5$ min | 879            | 21 (2.39)  | 1.975 (0.934–4.174)        |         |

\*P values and odds ratios are in bold font when the P values are less than or equal to 0.05.

DBP = diastolic blood pressure; MBP = mean blood pressure; OR = odds ratio; SBP = systolic blood pressure.

**Reference**

Monk TG, Bronsert MR, Henderson WG, Mangione MP, Sum-Ping J, Bentt DR, Nguyen JD, Richman JS, Meguid RA, Hammermeister KE: Association between intraoperative hypotension and hypertension and 30-day postoperative mortality in non-cardiac surgery. *ANESTHESIOLOGY* 2015; 123:307–19
